# Supplementary material
Source: MDPI journal article supplement (https://www.mdpi.com/1424-2818/14/12/1034)
Supplement: s1 [file s1]

| Site                                           | Netting site coordinates |          |
|------------------------------------------------|--------------------------|----------|
| <b>Agricultural site</b>                       |                          |          |
| Idan Dates                                     | 30.81102                 | 35.27299 |
| Tamar Dates                                    | 30.9391                  | 35.3817  |
| Hatseva Dates                                  | 30.75897                 | 35.29055 |
| Paran Dates                                    | 30.37134                 | 35.15411 |
| Samar Dates                                    | 29.82104                 | 35.03658 |
| Neot Semadar Dates                             | 30.00946                 | 35.09695 |
| Yotvata Dates                                  | 29.88363                 | 35.06787 |
| <b>Adjacent site / closest date plantation</b> |                          |          |
| Hatseva Pool / Hatseva dates                   | 30.76877                 | 35.27905 |
| Love Pond / Ein Tamar dates                    | 30.956                   | 35.36392 |
| Zofar Pool / Zofar dates                       | 30.56027                 | 35.18034 |
| Bird Centre / Eilot dates                      | 29.57374                 | 34.97178 |

Supplementary table S1: Mist net trapping locations for bats. Agricultural site reflects mist nets set up at locations within the plantations. Adjacent site reflect sites where it was not possible to set up nets within the closest date plantation, hence sites within 1km radius were chosen. The coordinates in decimal degrees reflect the location of the netting sites.
